# Supplementary material
Source: Research Square preprint supplement (doi:10.21203/rs.3.rs-9672292/v1)

## Monatshefte für Chemie - Chemical Monthly

### Checklist for compound characterization

- For each compound synthesized or isolated in the manuscript, complete one line below: enter the compound number, state whether the compound is new or known in literature, confirm that you have given it a systematic name, and mark with "x" all columns corresponding to data included in the manuscript.
- For new compounds  $^1\text{H}$  and  $^{13}\text{C}$  NMR data as well as elemental analyses or HRMS data is required; where appropriate, also include a corrected melting point and an  $R_f$  value.
- For known compounds either (a) a melting point together with a literature m.p. and the respective reference, or (b) a reference to the respective nmr data have to be given.
- Either complete the checklist electronically, or print the empty list, complete by hand, and scan it to a pdf file. Upload the checklist together with the manuscript as "Electronic Supplementary Material".

| Compound         |                       |     |       | New compounds    |                     |    |    |        |               |             |                    | Known compounds |                                          |                                     |
|------------------|-----------------------|-----|-------|------------------|---------------------|----|----|--------|---------------|-------------|--------------------|-----------------|------------------------------------------|-------------------------------------|
| Compound number  | Systematic name given | New | Known | $^1\text{H}$ NMR | $^{13}\text{C}$ NMR | IR | MS | UV-Vis | Melting point | $R_f$ value | Elemental analysis | Melting point   | Reference to melting point in literature | Reference to NMR data in literature |
| LH               | X                     | X   |       | X                |                     | X  |    | X      | X             |             | X                  |                 |                                          |                                     |
| CoL <sub>2</sub> | X                     | X   |       |                  |                     | X  |    | X      | X             |             | X                  |                 |                                          |                                     |
| NiL <sub>2</sub> | X                     | X   |       |                  |                     | X  |    | X      | X             |             | X                  |                 |                                          |                                     |
| CuL <sub>2</sub> | X                     | X   |       |                  |                     | X  |    | X      | X             |             | X                  |                 |                                          |                                     |
|                  |                       |     |       |                  |                     |    |    |        |               |             |                    |                 |                                          |                                     |
|                  |                       |     |       |                  |                     |    |    |        |               |             |                    |                 |                                          |                                     |
|                  |                       |     |       |                  |                     |    |    |        |               |             |                    |                 |                                          |                                     |
|                  |                       |     |       |                  |                     |    |    |        |               |             |                    |                 |                                          |                                     |
|                  |                       |     |       |                  |                     |    |    |        |               |             |                    |                 |                                          |                                     |

Dr. Ömer Faruk ÖZTÜRK



Supplement: Supplementary file 2 [file 459fa17780d66ceabc6f9efd.pdf]
