# Supplementary material
Source: Research Square preprint supplement (doi:10.21203/rs.3.rs-9672292/v1)
Supplement: Supplementary file 1 [file 1052df0647c65edcbca84ab1.docx]

- Novel SNS-functionalized Schiff base Co(II), Ni(II), and Cu(II) complexes were successfully synthesized.
- Metal coordination effectively tunes the electronic structure and redox characteristics of the system.
- Vivid multicolor electrochromism with high coloration efficiency (436 cm²/C) was achieved.
- The polymer films exhibit exceptional electrochemical stability over 5000 switching cycles.
- DFT studies and SEM analysis successfully elucidate the robust structure–property relationships.
